# Supplementary material for: Small Molecule Screen Identifies Non-catalytic USP3 Chemical Handle
Source: PubMed Central journal article supplement — ACS Omega. 2023 Dec 15;9(1):917–24. doi: 10.1021/acsomega.3c07070 (PMC10785082; doi:10.1021/acsomega.3c07070), 2023-12-15

# Small Molecule Screen Identifies Non-Catalytic

## USP3 Chemical Handle

*Mandeep K. Mann,<sup>‡,†</sup> Esther Wolf<sup>#</sup>, Madhushika Silva<sup>‡</sup>, Brian Wilson<sup>\$</sup>, Albina Bolotokova<sup>‡</sup>,  
Derek J. Wilson<sup>#</sup>, Rachel J. Harding<sup>\*,‡,†</sup>, Matthieu Schapira<sup>\*,‡,†</sup>*

<sup>‡</sup> Structural Genomics Consortium, University of Toronto, 101 College Street, MaRS South Tower, Suite 700, Toronto, Ontario M5G 1L7, Canada

<sup>#</sup> Department of Chemistry, York University, Toronto, Ontario M3J 1P3, Canada

<sup>†</sup> Department of Pharmacology and Toxicology, University of Toronto, 1 King's College Circle, Toronto, Ontario M5S 1A8, Canada

<sup>\$</sup> Drug Discovery Program, Ontario Institute for Cancer Research, Toronto, Ontario M5G 0A3, Canada

\*Corresponding Authors

- Table S1: Compounds smiles strings and catalog numbers ..... p.2
- Table S2: Matrix Screen results .....p.4
- Table S3: Kinase profiling.....p.6
- Table S4: PLGS filtering parameters .....p.7
- Figure S1: HDX sequence coverage of USP3<sup>1-131</sup> .....p.7
- Figure S2: Differential HDX heatmaps .....p.7
- Figure S3: Diversity of sidechains lining the binding pocket.....p.8

- Figure S4: Ligand RMSD over 100 ns MD simulation .....p.8

**Table S1: Compounds smiles strings and catalog numbers**

| Compound # | Catalog_Number | SMILES                                             |
|------------|----------------|----------------------------------------------------|
| 1          | STL102634      | <chem>C(C([O-])=O)c1cccnc1</chem>                  |
| 2          | STK256632      | <chem>C(Cn1cccn1)C([O-])=O</chem>                  |
| 3          | STK661679      | <chem>C(Cc1ccno1)C([O-])=O</chem>                  |
| 4          | Z57127332      | <chem>C(Cc1ccccc1)C(O)=O</chem>                    |
| 5          | STK802016      | <chem>C(C([O-])=O)Nc1ncccn1</chem>                 |
| 6          | IF_02_176      | <chem>C(Cc1cnccn1)C(O)=O</chem>                    |
| 7          | SY019802       | <chem>C(Cc1nccs1)C(O)=O</chem>                     |
| 8          | A0954          | <chem>C(C(O)=O)c1csc(N)n1</chem>                   |
| 9          | STK891980      | <chem>C(COc1ccccc1)C([O-])=O</chem>                |
| 10         | STL193409      | <chem>C(CN1C=CC=CC1=O)C([O-])=O</chem>             |
| 11         | Z1171978885    | <chem>C(C([O-])=O)c1cc2ccccc2o1</chem>             |
| 12         | STL163377      | <chem>C(C([O-])=O)c1nc2ccccc2[nH]1</chem>          |
| 13         | Z1333043518    | <chem>C(C([O-])=O)n1cc2ccccc2n1</chem>             |
| 14         | F1913-0024     | <chem>C(C([O-])=O)c1nc2ccccc2o1</chem>             |
| 15         | STL124046      | <chem>C(C([O-])=O)NC(c1cccnc1)=O</chem>            |
| 16         | STK526633      | <chem>C(CC(c1cccs1)=O)C([O-])=O</chem>             |
| 17         | STL190846      | <chem>C(C([O-])=O)c1cccc2ccnc12</chem>             |
| 18         | STK695471      | <chem>C(Cc1cn2cccn2n1)C([O-])=O</chem>             |
| 19         | EN300-14584    | <chem>C(Cn1cnc2ccccc12)C(O)=O</chem>               |
| 20         | EN300-70527    | <chem>C(C(O)=O)N1Cc2ccccc2C1=O</chem>              |
| 21         | STK504141      | <chem>C(C([O-])=O)Nc1ccc2nnnc2n1</chem>            |
| 22         | STK353430      | <chem>C(Cc1nc2ncccn2n1)C(O)=O</chem>               |
| 23         | Z188924494     | <chem>C(Cc1ccc2c(c1)OCO2)C([O-])=O</chem>          |
| 24         | IF_03_114      | <chem>C(CC(Nc1ccccc1)=O)C(O)=O</chem>              |
| 25         | STK723995      | <chem>C(C([O-])=O)Nc1c2ccccc2ncn1</chem>           |
| 26         | MS-2504        | <chem>C(C([O-])=O)Oc1cnc2ccccc2n1</chem>           |
| 27         | STK392449      | <chem>C(C([O-])=O)N1C=Nc2ccccc2C1=O</chem>         |
| 28         | EN300-188561   | <chem>C(C(O)=O)N1C=Cc2ccccc2C1=O</chem>            |
| 29         | STK738252      | <chem>C(CN1C(=O)Oc2ccccc12)C([O-])=O</chem>        |
| 30         | Z57983005      | <chem>C(C1C(Nc2ccccc2O1)=O)C(O)=O</chem>           |
| 31         | STK447336      | <chem>Cc1cc(NC(CCC([O-])=O)=O)nn1C</chem>          |
| 32         | CDS014372      | <chem>C1C[C@H](C(N)=O)N(C1)C(CCC([O-])=O)=O</chem> |
| 33         | Z126932466     | <chem>C(Cc1cnn(c1)c1ccccc1)C(O)=O</chem>           |
| 34         | STK500480      | <chem>C(Cc1nc(c2ccccc2)no1)C([O-])=O</chem>        |

|    |                       |                                                                         |
|----|-----------------------|-------------------------------------------------------------------------|
| 35 | TS-00478              | <chem>C(Cc1nnc(c2cccc2)o1)C([O-])=O</chem>                              |
| 36 | STL310201             | <chem>C(CC([O-])=O)C1C(N2C=CC=CC2=NN=1)=O</chem>                        |
| 37 | AL-291/37197008       | <chem>C(Cn1nc(c2cccc2)nn1)C(O)=O</chem>                                 |
| 38 | STK099228             | <chem>C(CC(N1CCc2cccc12)=O)C([O-])=O</chem>                             |
| 39 | Z166605066            | <chem>C(CN1C(c2cccc2N=N1)=O)C(O)=O</chem>                               |
| 40 | STK946249             | <chem>C(CN1C(c2cccc2S1)=O)C([O-])=O</chem>                              |
| 41 | EN300-00843           | <chem>CC1(C)Cc2ccc(c2O1)OCC(O)=O</chem>                                 |
| 42 | EN300-35451           | <chem>CC1=C(CCC([O-])=O)C(NC(=N1)SC)=O</chem>                           |
| 43 | Z1259161843           | <chem>C(C([O-])=O)Nc1ccc(cc1)S(N)(=O)=O</chem>                          |
| 44 | EN300-10660           | <chem>Cc1c2C(N(CC([O-])=O)C=Nc2sc1C)=O</chem>                           |
| 45 | IF_04_062             | <chem>C(Cc1nc2cccc3cccc(c23)[nH]1)C(O)=O</chem>                         |
| 46 | IF_03_115             | <chem>C(CC(Nc1cccc2cccc12)=O)C(O)=O</chem>                              |
| 47 | Z90120424             | <chem>C(C(O)=O)N1C=Nc2c3cccc3oc2C1=O</chem>                             |
| 48 | EN300-137714          | <chem>C(CC(c1ccc2c(CCC(N2)=O)c1)=O)C(O)=O</chem>                        |
| 49 | Z102925466            | <chem>C(CN1C(c2cccc2S1(=O)=O)=O)C(O)=O</chem>                           |
| 50 | IF_01_187             | <chem>C(Cc1cccc1OCc1ccccn1)C(O)=O</chem>                                |
| 51 | STK925744             | <chem>CC1=CC(=O)Oc2cc(c(CCC([O-])=O)cc12)OC</chem>                      |
| 52 | STK682580             | <chem>C1CCn2c(C1)c(C#N)c1c2C(N(CC(O)=O)C=N1)=O</chem>                   |
| 53 | KM09821               | <chem>C(CC(O)=O)CN1CCC(=CC1)c1cccc1.[Cl]</chem>                         |
| 54 | STK545027             | <chem>CC(C(O)=O)N1C(C=Cc2ccc(cc2)OC)SC1=O)=O</chem>                     |
| 55 | Z1682077208           | <chem>C1CCN(C1)S(c1ccc(cc1)C(CCC(O)=O)=O)(=O)=O</chem>                  |
| 56 | 79148212              | <chem>C(Cc1nc2cccc2n1c1cc(C(N)=O)sc1)C(O)=O</chem>                      |
| 57 | MS-2054               | <chem>C(C(Nc1nnc(SCC(O)=O)s1)=O)Oc1cccc1</chem>                         |
| 58 | Z609944470            | <chem>C(Cc1nc2cccc2c2nc(Cc3cccc3)nn12)C([O-])=O</chem>                  |
| 59 | Z1373577255 [Enamine] | <chem>C(CC(c1cccc(c1)NS(c1c[nH]c2c1cccn2)(=O)=O)=O)C(O)=O</chem>        |
| 60 | Z1413959119           | <chem>Cc1ccc(cc1S(Nc1cccc(c1)C(CCC(O)=O)=O)(=O)=O)C(O)=O</chem>         |
| 61 | HGA-4028-0036-50      | <chem>C1CN(CCC1c1ccc(cc1)[Cl])C(c1ccc(C(NCC(O)=O)=O)nc1)=O</chem>       |
| 62 | CAZ-0010-0660-20      | <chem>C1CN(CCC1N1C(=O)Oc2cccc12)S(c1ccc(cc1)C(NCC(O)=O)=O)(=O)=O</chem> |

**Table S2: Matrix Screen results** (1000 means KD > 1000  $\mu$ M)

| Compound # | KD ( $\mu$ M) |      |       |       |       |       |       |       |       |      |       |
|------------|---------------|------|-------|-------|-------|-------|-------|-------|-------|------|-------|
|            | USP3          | USP5 | USP13 | USP16 | USP20 | USP33 | USP39 | USP49 | USP51 | BRAP | HDAC6 |
| 1          | 121           | 1000 | 1000  | 96.1  | 707   | 115   | 180   | 283   | 1000  | 73.9 | 1000  |
| 2          | 1000          | 1000 | 98.2  | 1000  | 182   | 1000  | 1000  | 56    | 1000  | 74.4 | 1000  |
| 3          | 1000          | 1000 | 1000  | 1000  | 1000  | 1000  | 1000  | 1000  | 1000  | 1000 | 1000  |
| 4          | 178           | 1000 | 1000  | 429   | 1000  | 1000  | 1000  | 172   | 1000  | 82.9 | 1000  |
| 5          | 855           | 1000 | 616   | 1000  | 574   | 1000  | 1000  | 1000  | 1000  | 1000 | 1000  |



|           |      |      |      |      |      |      |      |      |      |      |       |
|-----------|------|------|------|------|------|------|------|------|------|------|-------|
| 46        | 1000 | 1000 | 1000 | 1000 | 1000 | 1000 | 1000 | 1000 | 1000 | 66   | 198.8 |
| 47        | 1000 | 312  | 1000 | 344  | 426  | 1000 | 1000 | 1000 | 1000 | 253  | 247   |
| 48        | 140  | 532  | 1000 | 167  | 821  | 1000 | 1000 | 99.9 | 1000 | 126  | 103.6 |
| 49        | 1000 | 1000 | 1000 | 1000 | 1000 | 1000 | 1000 | 1000 | 1000 | 1000 | 1000  |
| 50        | 49.5 | 1000 | 365  | 48.2 | 249  | 1000 | 1000 | 1000 | 1000 | 483  | 1000  |
| 51        | 354  | 1000 | 867  | 535  | 465  | 1000 | 1000 | 86.2 | 1000 | 71.6 | 343.2 |
| 52        | 603  | 207  | 1000 | 403  | 552  | 1000 | 1000 | 1000 | 1000 | 215  | 105.4 |
| 53        | 1000 | 561  | 594  | 1000 | 380  | 1000 | 1000 | 1000 | 1000 | 1000 | 1000  |
| 54        | 441  | 1000 | 1000 | 116  | 457  | 1000 | 1000 | 1000 | 1000 | 1000 | 1000  |
| 55        | 91.5 | 117  | 1000 | 139  | 798  | 1000 | 1000 | 1000 | 1000 | 340  | 51.54 |
| 56        | 1000 | 1000 | 754  | 1000 | 464  | 1000 | 1000 | 1000 | 1000 | 1000 | 1000  |
| 57        | 219  | 315  | 745  | 372  | 401  | 1000 | 1000 | 1000 | 1000 | 703  | 273.4 |
| 58        | 238  | 847  | 1000 | 285  | 1000 | 1000 | 1000 | 1000 | 1000 | 1000 | 187.4 |
| 59        | 19.1 | 168  | 1000 | 69.8 | 706  | 1000 | 1000 | 1000 | 1000 | 413  | 211.6 |
| 60        | 283  | 1000 | 1000 | 114  | 1000 | 537  | 942  | 187  | 1000 | 234  | 1000  |
| 61        | 344  | 71.1 | 642  | 436  | 430  | 1000 | 1000 | 1000 | 1000 | 537  | 415   |
| 62        | 216  | 127  | 1000 | 536  | 1000 | 1000 | 1000 | 1000 | 1000 | 1000 | 234.1 |
| Ub        | 4.83 | 3.01 | 1000 | 8.55 | 1000 | 1000 | 1000 | 1000 | 1000 | 35   | 9.134 |
| Ub-RGGdel | 1000 | 1000 | 1000 | 1000 | 1000 | 1000 | 1000 | 1000 | 1000 | 1000 | 1000  |

**Table S3: Eurofins Diversity panel on 58 kinases (Radiometric activity assay)**

| Kinase               | Catalogue Number | % kinase activity in the presence of 10 $\mu$ M of compound 59 |
|----------------------|------------------|----------------------------------------------------------------|
| Abl(h)               | 14-529KP         | 96                                                             |
| ALK(h)               | 14-555KP         | 98                                                             |
| AMPK $\alpha$ 1(h)   | 14-840KP         | 90                                                             |
| ASK1(h)              | 14-606KP         | 91                                                             |
| Aurora-A(h)          | 14-511KP         | 56                                                             |
| CaMKI(h)             | 14-663KP         | 98                                                             |
| CDK1/cyclinB(h)      | 14-450KP         | 111                                                            |
| CDK2/cyclinA(h)      | 14-448KP         | 106                                                            |
| CDK6/cyclinD3(h)     | 14-519KP         | 93                                                             |
| CDK7/cyclinH/MAT1(h) | 14-476KP         | 85                                                             |
| CDK9/cyclin T1(h)    | 14-685KP         | 100                                                            |
| CHK1(h)              | 14-346KP         | 108                                                            |
| CK1 $\gamma$ 1(h)    | 14-711KP         | 104                                                            |
| CK2 $\alpha$ 2(h)    | 14-689KP         | 112                                                            |
| c-RAF(h)             | 14-352KP         | 108                                                            |
| DRAK1(h)             | 14-668KP         | 106                                                            |
| eEF-2K(h)            | 14-654KP         | 106                                                            |
| EGFR(h)              | 14-531KP         | 98                                                             |
| EphA5(h)             | 14-639KP         | 99                                                             |
| EphB4(h)             | 14-554KP         | 88                                                             |

|                                              |          |     |
|----------------------------------------------|----------|-----|
| Fyn(h)                                       | 14-441KP | 84  |
| GSK3 $\beta$ (h)                             | 14-306KP | 99  |
| IGF-1R(h)                                    | 14-465KP | 125 |
| IKK $\alpha$ (h)                             | 14-461KP | 115 |
| IRAK4(h)                                     | 14-599KP | 97  |
| JAK2(h)                                      | 14-640KP | 108 |
| KDR(h)                                       | 14-630KP | 87  |
| LOK(h)                                       | 14-686KP | 103 |
| Lyn(h)                                       | 14-510KP | 93  |
| MAPKAP-K2(h)                                 | 14-337KP | 101 |
| MEK1(h)                                      | 14-429KP | 107 |
| MLK1(h)                                      | 14-690KP | 96  |
| Mnk2(h)                                      | 14-664KP | 111 |
| MSK2(h)                                      | 14-616KP | 108 |
| MST1(h)                                      | 14-624KP | 96  |
| mTOR(h)                                      | 14-769KP | 99  |
| NEK2(h)                                      | 14-545KP | 105 |
| p70S6K(h)                                    | 14-486KP | 99  |
| PAK2(h)                                      | 14-481KP | 97  |
| PDGFR $\beta$ (h)                            | 14-463KP | 80  |
| Pim-1(h)                                     | 14-573KP | 92  |
| PKA(h)                                       | 14-440KP | 89  |
| PKB $\alpha$ (h)                             | 14-276KP | 104 |
| PKC $\alpha$ (h)                             | 14-484KP | 85  |
| PKC $\theta$ (h)                             | 14-444KP | 109 |
| PKG1 $\alpha$ (h)                            | 14-688KP | 99  |
| Plk3(h)                                      | 14-572KP | 104 |
| PRAK(h)                                      | 14-334KP | 104 |
| ROCK-I(h)                                    | 14-601KP | 112 |
| Rse(h)                                       | 14-535KP | 118 |
| Rsk1(h)                                      | 14-509KP | 110 |
| SAPK2a(h)                                    | 14-251KP | 88  |
| SRPK1(h)                                     | 14-564KP | 105 |
| TAK1(h)                                      | 14-600KP | 106 |
| PI3 Kinase (p110 $\beta$ /p85 $\alpha$ )(h)  | 14-603KP | 98  |
| PI3 Kinase (p120 $\gamma$ )(h)               | 14-558KP | 100 |
| PI3 Kinase (p110 $\delta$ /p85 $\alpha$ )(h) | 14-604KP | 96  |
| PI3 Kinase (p110 $\alpha$ /p85 $\alpha$ )(h) | 14-602KP | 98  |

**Table S4: ProteinLynx Global SERVER (PLGS) filtering parameters**

| Parameter | Min. intensity | Min. sequence length | Max. sequence length | Min. products per amino acid | Minimum score | Max. MH+ Error (ppm) |
|-----------|----------------|----------------------|----------------------|------------------------------|---------------|----------------------|
| Value     | 20000          | 4                    | 26                   | 0.12                         | 7             | 5                    |

**Figure S1: HDX sequence coverage of USP3<sup>1-131</sup>**

A total of 59 peptides yielded 93.9% sequence coverage and a redundancy of 5.24. Black rectangles aligned to sequence represent peptides. Several peptides including 52-86 (length 35) and 53-86 (length 34) were manually added after PLGS filtering to obtain coverage from 53-60.

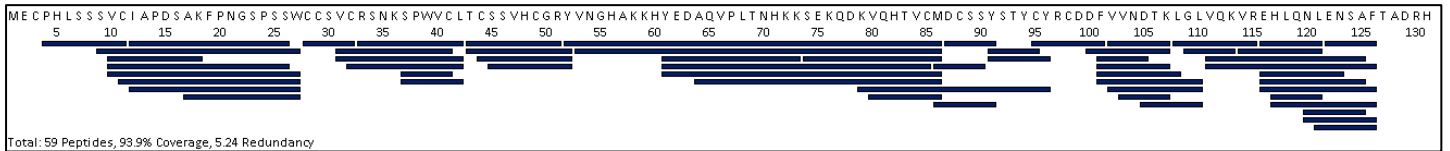

**Figure S2: Differential HDX heatmaps**

Differential fractional uptake is displayed as a per-residue averaged heatmap aligned to USP3 primary sequence for USP3 Zf-UBD in complex with **59** at 1:10 (top) and 1:20 (bottom) . The highest magnitude D decreases (-5 %) are blue and D increases (+5%) are red. A limitation of this heatmap illustration (DynamX 3.0) is that it does not factor in the associated error for each residue. Please refer to Figure 4 for a peptide-level differential HDX bar-plot with associated error.

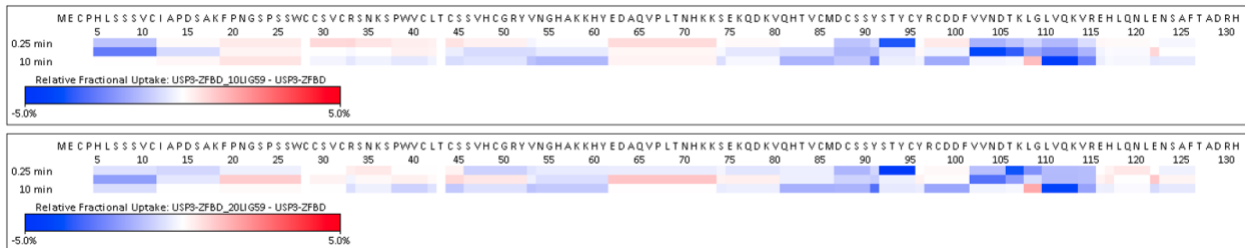

**Figure S3: Diversity of sidechains lining the binding pocket of 59.** Residues lining the pocket are highlighted in blue. Positions where a specific side-chain is unique to USP3 are highlighted with red arrows.

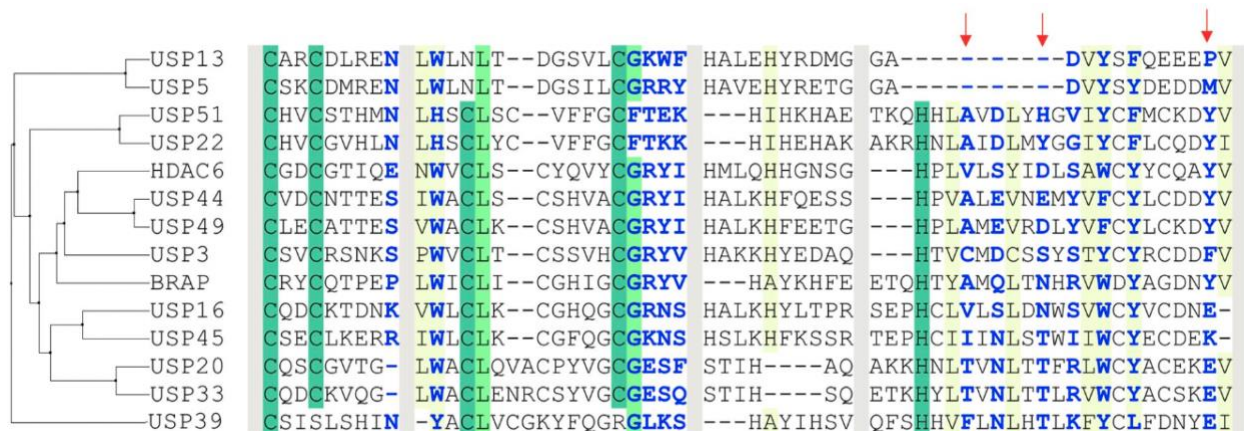

**Figure S4: Ligand RMSD over 100 ns MD simulation**

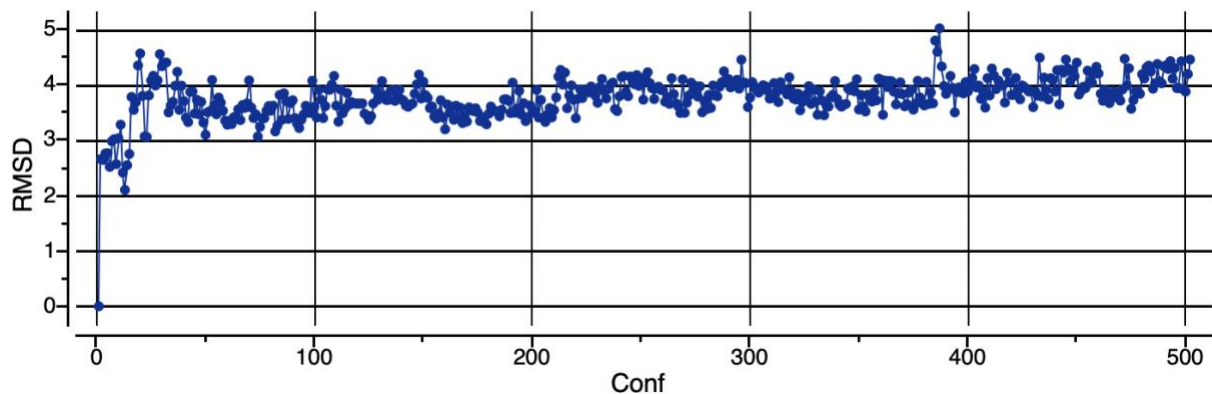

Supplement: ao3c07070_si_001.pdf [file ao3c07070_si_001.pdf]
